# Supplementary material for: Whole Genome Sequencing of Mycobacterium africanum Strains from Mali Provides Insights into the Mechanisms of Geographic Restriction
Source: PubMed Central journal article supplement (PMC4713829; doi:10.1371/journal.pntd.0004332), 2016-01-11

# A rifampicin mgit rmp 10µg/ml

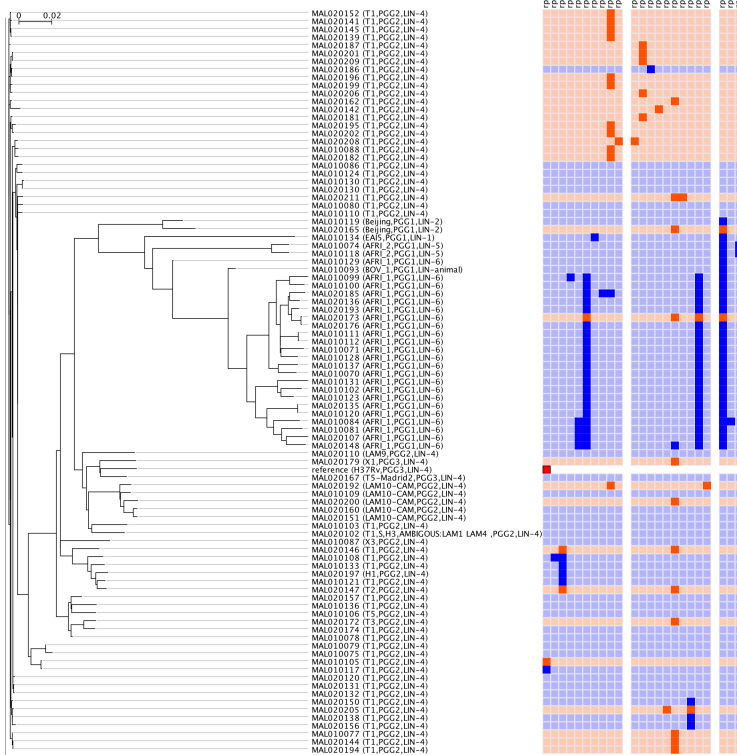

Supplement: pntd.0004332.s002.pdf [file pntd.0004332.s002.pdf]
